# Supplementary material
Source: MDPI journal article supplement (https://www.mdpi.com/2311-5637/8/2/67)
Supplement: s1 [file s1 › fermentation-1560395-supplementary.pdf]

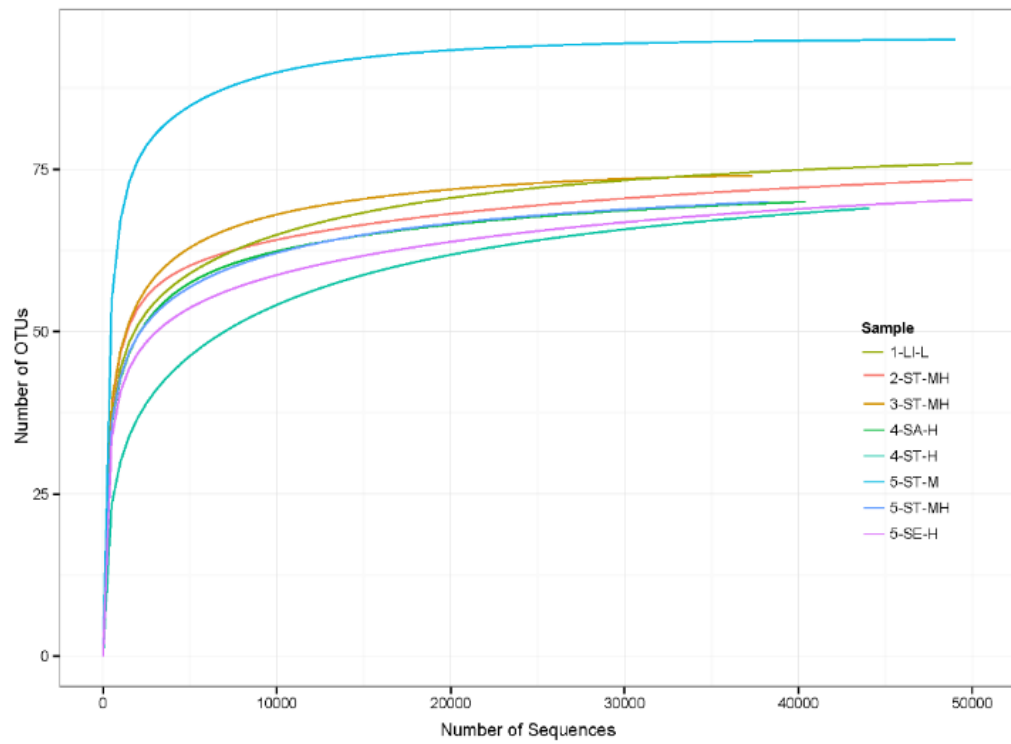

(a)

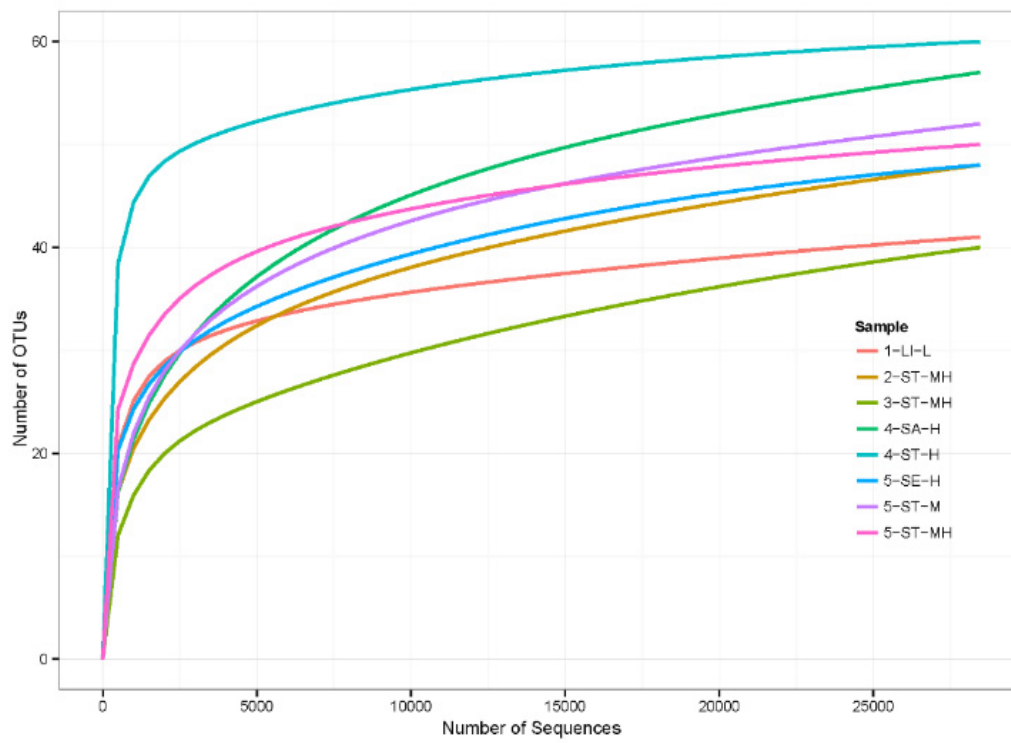

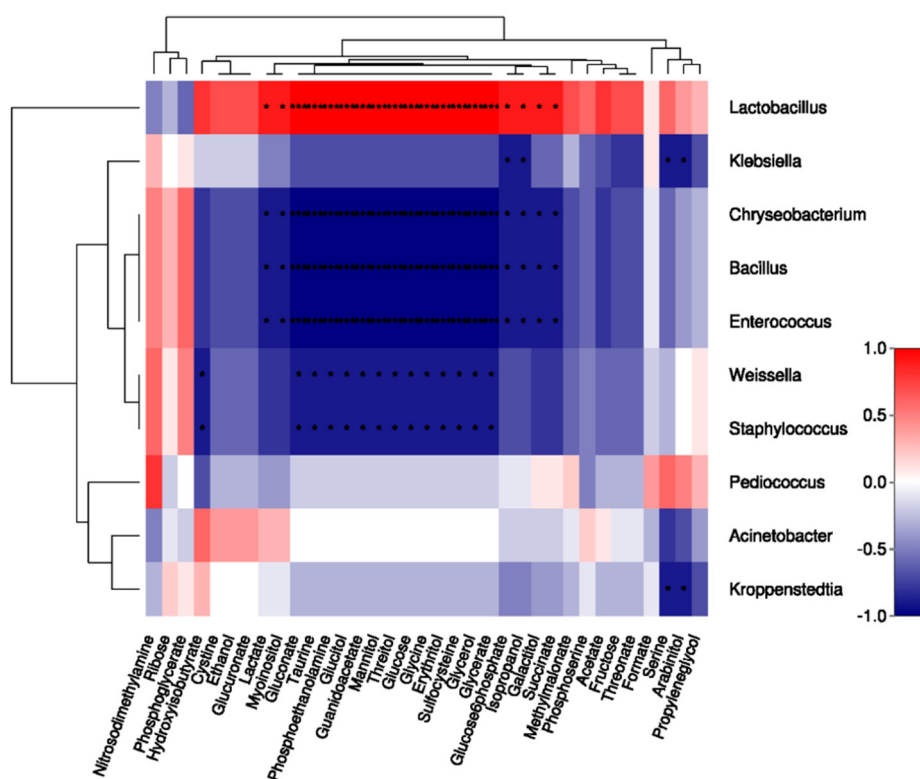

(a)

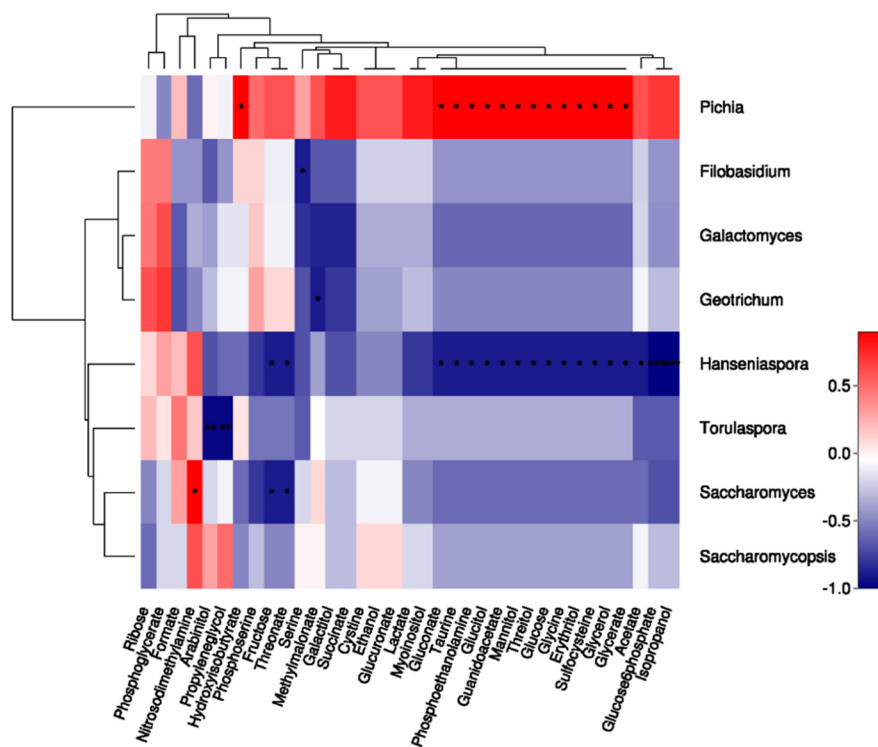

(b)

Figure S2. Correlation of microbial community and non-volatile metabolites during fermentation. (a) correlation of bacterial community and metabolites during fermentation; (b) correlation of fungal community and metabolites during fermentation.
